# Supplementary material
Source: HighWire-hosted journal article supplement (https://bmjopen.bmj.com/content/12/10/e063404)
Supplement: inline-supplementary-material-3 [file inline-supplementary-material-3.pdf]

**Supplementary Material 3. Electronic search strategy for the randomised controlled trials of anxiety disorder treatments in children and adolescents. Search conducted on 21<sup>st</sup> May 2021.**

| Database [Platform]                                                                           | Searches run May 21, 2021 |
|-----------------------------------------------------------------------------------------------|---------------------------|
| MEDLINE(R) and Epub Ahead of Print, In-Process & Other Non-Indexed Citations and Daily [OVID] | 1946 to May 20, 2021      |
| Embase Classic+Embase [OVID]                                                                  | 1947 to 2021 Week 19      |
| PsycInfo [OVID]                                                                               | 1967 to May Week 3, 2021  |
| CINAHL [EBSCO]                                                                                | May 21, 2021              |

**A. MEDLINE(R) Search and Epub Ahead of Print, In-Process, In-Data-Review & Other Non-Indexed Citations and Daily (1946 to May 20, 2021)**

Search Strategy:

| #  | Searches                                                                                                                                                                                                                                                                                                                                                                                                                                                                  |
|----|---------------------------------------------------------------------------------------------------------------------------------------------------------------------------------------------------------------------------------------------------------------------------------------------------------------------------------------------------------------------------------------------------------------------------------------------------------------------------|
| 1  | Anxiety Disorders/                                                                                                                                                                                                                                                                                                                                                                                                                                                        |
| 2  | Agoraphobia/                                                                                                                                                                                                                                                                                                                                                                                                                                                              |
| 3  | Anxiety, Separation/                                                                                                                                                                                                                                                                                                                                                                                                                                                      |
| 4  | Neurotic Disorders/                                                                                                                                                                                                                                                                                                                                                                                                                                                       |
| 5  | Panic Disorder/                                                                                                                                                                                                                                                                                                                                                                                                                                                           |
| 6  | Phobic Disorders/                                                                                                                                                                                                                                                                                                                                                                                                                                                         |
| 7  | Phobia, Social/                                                                                                                                                                                                                                                                                                                                                                                                                                                           |
| 8  | (anxiety disorder? or anxiety neuroses or neurotic anxiety state? or generalised anxiety or panic disorder? or panic attack? or selective mutism* or social anxiety* or separation anxiety* or neuroses or neurotic disorder? or psychoneuroses or phobia? or phobic or claustrophobia? or claustrophobic).tw,kf.                                                                                                                                                         |
| 9  | or/1-8                                                                                                                                                                                                                                                                                                                                                                                                                                                                    |
| 10 | exp adolescent/ or exp child/ or childhood disease*.ti,ab,kf. or (adolescen* or child* or juvenil* or paediatric* or peadiatric* or pediatric* or puber* or pubescen* or teen* or toddler? or underage? or under-age? or youth*).ti,ab,kf. or (pediatric* or paediatric* or child* or adolescen* or young).jn,jw. or (pediatric* or paediatric* or child* or adolescen* or young).in. [Modified Wolters Kluwer Expert Search Children Broad Medline (OVID) Search Filter] |
| 11 | randomized controlled trial.pt.                                                                                                                                                                                                                                                                                                                                                                                                                                           |
| 12 | controlled clinical trial.pt.                                                                                                                                                                                                                                                                                                                                                                                                                                             |
| 13 | randomised.ab.                                                                                                                                                                                                                                                                                                                                                                                                                                                            |

|    |                                                                                                                                                                         |
|----|-------------------------------------------------------------------------------------------------------------------------------------------------------------------------|
| 14 | placebo.ab.                                                                                                                                                             |
| 15 | drug therapy.fs.                                                                                                                                                        |
| 16 | randomly.ab.                                                                                                                                                            |
| 17 | trial.ab.                                                                                                                                                               |
| 18 | groups.ab.                                                                                                                                                              |
| 19 | or/11-18                                                                                                                                                                |
| 20 | exp animals/ not humans.sh.                                                                                                                                             |
| 21 | 19 not 20 [Box 3.c Cochrane Highly Sensitive Search Strategy for identifying randomized trials in MEDLINE: sensitivity-maximizing version (2008 revision); Ovid format] |
| 22 | 9 and 10 and 21                                                                                                                                                         |
| 23 | limit 22 to english language                                                                                                                                            |
| 24 | limit 23 to yr="2010 -Current"                                                                                                                                          |

### B. Embase Classic + Embase Search (1947 to 2021 Week 19)

Search Strategy:

| # | Searches                                                                                                                                                                                                                                                                                                          |
|---|-------------------------------------------------------------------------------------------------------------------------------------------------------------------------------------------------------------------------------------------------------------------------------------------------------------------|
| 1 | anxiety disorder/ or anxiety neurosis/ or generalized anxiety disorder/ or "mixed anxiety and depression"/ or panic/ or exp phobia/ or separation anxiety/                                                                                                                                                        |
| 2 | (anxiety disorder? or anxiety neuroses or neurotic anxiety state? or generalised anxiety or panic disorder? or panic attack? or selective mutism* or social anxiety* or separation anxiety* or neuros#s or neurotic disorder? or psychoneuros#s or phobia? or phobic or claustrophobia? or claustrophobic).tw,kw. |
| 3 | or/1-2                                                                                                                                                                                                                                                                                                            |
| 4 | adolescent/                                                                                                                                                                                                                                                                                                       |
| 5 | adolescence/                                                                                                                                                                                                                                                                                                      |
| 6 | child/                                                                                                                                                                                                                                                                                                            |
| 7 | toddler/                                                                                                                                                                                                                                                                                                          |
| 8 | exp childhood disease/                                                                                                                                                                                                                                                                                            |
| 9 | (adolescen* or child* or juvenil* or paediatric* or peadiatric* or pediatric* or puber* or pubescen* or teen* or toddler? or underage? or under-age? or youth*).ti,ab,kw.                                                                                                                                         |

|    |                                                                                                                                                                                                                                                                                                                                                                                                                                                                                                                                                                                                                                                                                                                                                                                                                                                                                                                                                                                                                                                                                                                                                                                                                                                                                                                                                                                                                                                                                                                                                                                                                                                                                                                                                                                                                                                                                                                                                                                                                                                                                  |
|----|----------------------------------------------------------------------------------------------------------------------------------------------------------------------------------------------------------------------------------------------------------------------------------------------------------------------------------------------------------------------------------------------------------------------------------------------------------------------------------------------------------------------------------------------------------------------------------------------------------------------------------------------------------------------------------------------------------------------------------------------------------------------------------------------------------------------------------------------------------------------------------------------------------------------------------------------------------------------------------------------------------------------------------------------------------------------------------------------------------------------------------------------------------------------------------------------------------------------------------------------------------------------------------------------------------------------------------------------------------------------------------------------------------------------------------------------------------------------------------------------------------------------------------------------------------------------------------------------------------------------------------------------------------------------------------------------------------------------------------------------------------------------------------------------------------------------------------------------------------------------------------------------------------------------------------------------------------------------------------------------------------------------------------------------------------------------------------|
| 10 | (pediatric* or paediatric* or child* or adolescen* or young).jn,jw. or (pediatric* or paediatric* or child* or adolescen* or young).in.                                                                                                                                                                                                                                                                                                                                                                                                                                                                                                                                                                                                                                                                                                                                                                                                                                                                                                                                                                                                                                                                                                                                                                                                                                                                                                                                                                                                                                                                                                                                                                                                                                                                                                                                                                                                                                                                                                                                          |
| 11 | or/4-10                                                                                                                                                                                                                                                                                                                                                                                                                                                                                                                                                                                                                                                                                                                                                                                                                                                                                                                                                                                                                                                                                                                                                                                                                                                                                                                                                                                                                                                                                                                                                                                                                                                                                                                                                                                                                                                                                                                                                                                                                                                                          |
| 12 | (Randomized controlled trial/ or Controlled clinical study/ or random*.ti,ab. or randomization/ or intermethod comparison/ or placebo.ti,ab. or (compare or compared or comparison).ti. or ((evaluated or evaluate or evaluating or assessed or assess) and (compare or compared or comparing or comparison)).ab. or (open adj label).ti,ab. or ((double or single or doubly or singly) adj (blind or blinded or blindly)).ti,ab. or double blind procedure/ or parallel group*1.ti,ab. or (crossover or cross over).ti,ab. or ((assign* or match or matched or allocation) adj5 (alternate or group*1 or intervention*1 or patient*1 or subject*1 or participant*1)).ti,ab. or (assigned or allocated).ti,ab. or (controlled adj7 (study or design or trial)).ti,ab. or (volunteer or volunteers).ti,ab. or human experiment/ or trial.ti.) not (((random* adj sampl* adj7 ("cross section*" or questionnaire*1 or survey* or database*1)).ti,ab. not (comparative study/ or controlled study/ or randomi?ed controlled.ti,ab. or randomly assigned.ti,ab.)) or (Cross-sectional study/ not (randomized controlled trial/ or controlled clinical study/ or controlled study/ or randomi?ed controlled.ti,ab. or control group*1.ti,ab.)) or (((case adj control*) and random*) not randomi?ed controlled).ti,ab. or (Systematic review not (trial or study)).ti. or (nonrandom* not random*).ti,ab. or "Random field*".ti,ab. or (random cluster adj3 sampl*).ti,ab. or ((review.ab. and review.pt.) not trial.ti.) or ("we searched".ab. and (review.ti. or review.pt.)) or "update review".ab. or (databases adj4 searched).ab. or ((rat or rats or mouse or mice or swine or porcine or murine or sheep or lambs or pigs or piglets or rabbit or rabbits or cat or cats or dog or dogs or cattle or bovine or monkey or monkeys or trout or marmoset*1).ti. and animal experiment/) or (Animal experiment/ not (human experiment/ or human/))) [Box 3.e Cochrane Highly Sensitive Search Strategy for identifying controlled trials in Embase: (2018 revision); Ovid format] |
| 13 | 3 and 11 and 12                                                                                                                                                                                                                                                                                                                                                                                                                                                                                                                                                                                                                                                                                                                                                                                                                                                                                                                                                                                                                                                                                                                                                                                                                                                                                                                                                                                                                                                                                                                                                                                                                                                                                                                                                                                                                                                                                                                                                                                                                                                                  |
| 14 | limit 13 to english language                                                                                                                                                                                                                                                                                                                                                                                                                                                                                                                                                                                                                                                                                                                                                                                                                                                                                                                                                                                                                                                                                                                                                                                                                                                                                                                                                                                                                                                                                                                                                                                                                                                                                                                                                                                                                                                                                                                                                                                                                                                     |
| 15 | limit 14 to yr="2010 -Current"                                                                                                                                                                                                                                                                                                                                                                                                                                                                                                                                                                                                                                                                                                                                                                                                                                                                                                                                                                                                                                                                                                                                                                                                                                                                                                                                                                                                                                                                                                                                                                                                                                                                                                                                                                                                                                                                                                                                                                                                                                                   |
| 16 | limit 15 to (books or chapter or conference abstract or conference paper or "conference review")                                                                                                                                                                                                                                                                                                                                                                                                                                                                                                                                                                                                                                                                                                                                                                                                                                                                                                                                                                                                                                                                                                                                                                                                                                                                                                                                                                                                                                                                                                                                                                                                                                                                                                                                                                                                                                                                                                                                                                                 |
| 17 | 15 not 16                                                                                                                                                                                                                                                                                                                                                                                                                                                                                                                                                                                                                                                                                                                                                                                                                                                                                                                                                                                                                                                                                                                                                                                                                                                                                                                                                                                                                                                                                                                                                                                                                                                                                                                                                                                                                                                                                                                                                                                                                                                                        |

**C. PsycInfo Search (1967 to May Week 3 2021)**

Search Strategy:

| # | Searches                                                                                                                                                                                                                                                                                                                                                                                                                                                                                                                                                                                                                                                                                                           |
|---|--------------------------------------------------------------------------------------------------------------------------------------------------------------------------------------------------------------------------------------------------------------------------------------------------------------------------------------------------------------------------------------------------------------------------------------------------------------------------------------------------------------------------------------------------------------------------------------------------------------------------------------------------------------------------------------------------------------------|
| 1 | exp anxiety disorders/<br><br>(anxiety disorder? or anxiety neuroses or neurotic anxiety state? or generalised anxiety or panic disorder? or panic attack? or selective mutism* or social anxiety* or separation anxiety* or cardiac neuros#s or effort syndrome or hyperkinetic heart syndrome or neurocirculatory asthenia? or neuros#s or neurotic disorder? or psychoneuros#s or anankastic personalit* or obsessive compulsive disorder? or obsessive-compulsive neuros#s or OCD or phobia? or phobic or claustrophobia? or claustrophobic or hoarding disorder? or obsessive hoarding).tw.                                                                                                                   |
| 2 | or/1-2                                                                                                                                                                                                                                                                                                                                                                                                                                                                                                                                                                                                                                                                                                             |
| 3 | adolescent development/ or childhood development/ or pediatrics/ or exp Congenital Disorders/ or child characteristics/ or child abuse/ or exp child welfare/ or chronically ill children/ or child neglect/ or child psychiatry/ or child psychopathology/ or exp child care/ or (pediatric* or paediatric* or child* or congenital* or toddler* or pubescen* or juvenile* or teen* or youth* or adolesc* or prepubesc* or pre pubesc*).mp. or (child* or adolesc* or pediat* or paediat*).jn.                                                                                                                                                                                                                    |
| 4 | exp Clinical Trials/ or Placebo/ or (random* or sham or placebo* or ((singl* or doubl*) adj (blind* or dumm* or mask*)) or ((tripl* or trebl*) adj (blind* or dumm* or mask*)) or (control* adj3 (study or studies or trial* or group*)) or Nonrandom* or non random* or non-random* or quasi-random* or quasirandom* or allocated or ((open label or open-label) adj5 (study or studies or trial*)) or ((equivalence or superiority or non-inferiority or noninferiority) adj3 (study or studies or trial*)) or ((pragmatic or practical) adj3 trial*) or ((quasiexperimental or quasi-experimental) adj3 (study or studies or trial*)) or (phase adj3 (III or "3") adj3 (study or studies or trial*))).ti,ab,hw. |
| 5 | 3 and 4 and 5                                                                                                                                                                                                                                                                                                                                                                                                                                                                                                                                                                                                                                                                                                      |
| 6 | 3 and 4 and 6                                                                                                                                                                                                                                                                                                                                                                                                                                                                                                                                                                                                                                                                                                      |
| 7 | limit 7 to english language                                                                                                                                                                                                                                                                                                                                                                                                                                                                                                                                                                                                                                                                                        |
| 8 | limit 8 to yr="2010 -Current"                                                                                                                                                                                                                                                                                                                                                                                                                                                                                                                                                                                                                                                                                      |

## CINAHL Plus [EBSCO] (21 May 2021)

| #   | Query                                                                                                                                                                                                                                                                                                                                                                                                                                                                                                                            | Limiters/Expanders                                                                                     | Last Run Via                                                                                                                  |
|-----|----------------------------------------------------------------------------------------------------------------------------------------------------------------------------------------------------------------------------------------------------------------------------------------------------------------------------------------------------------------------------------------------------------------------------------------------------------------------------------------------------------------------------------|--------------------------------------------------------------------------------------------------------|-------------------------------------------------------------------------------------------------------------------------------|
| S12 | S5 AND S9 AND S10                                                                                                                                                                                                                                                                                                                                                                                                                                                                                                                | Limiters - Published Date:<br>20100101-20211231;<br>Language: English<br>Search modes - Boolean/Phrase | Interface - EBSCOhost<br>Research Databases<br>Search Screen - Advanced<br>Search<br>Database - CINAHL Plus with<br>Full Text |
| S11 | S5 AND S9 AND S10                                                                                                                                                                                                                                                                                                                                                                                                                                                                                                                | Search modes - Boolean/Phrase                                                                          | Interface - EBSCOhost<br>Research Databases<br>Search Screen - Advanced<br>Search<br>Database - CINAHL Plus with<br>Full Text |
| S10 | ( MH ( randomized controlled trials OR double-blind studies OR single-blind studies OR random assignment OR pretest-posttest design OR cluster sample ) OR TI ( randomised OR randomized ) OR AB random* OR TI trial OR ( (MH (sample size) AND AB (assigned OR allocated OR control)) ) OR MH ( placebos OR crossover design OR comparative studies ) OR AB ( (control W5 group) OR (cluster W3 RCT) OR PT (randomized controlled trial)) ) NOT ( ( MH animals+ OR MH (animal studies) OR TI (animal model*) ) NOT MH (human) ) | Search modes - Boolean/Phrase                                                                          | Interface - EBSCOhost<br>Research Databases<br>Search Screen - Advanced<br>Search<br>Database - CINAHL Plus with<br>Full Text |
| S9  | S6 AND S7 AND S8                                                                                                                                                                                                                                                                                                                                                                                                                                                                                                                 | Search modes - Boolean/Phrase                                                                          | Interface - EBSCOhost<br>Research Databases<br>Search Screen - Advanced<br>Search<br>Database - CINAHL Plus with<br>Full Text |
| S8  | TI ( pediatric* or paediatric* or child* or toddler* or pubescen* or juvenile* or teen* or youth* or adolesc* or prepubesc* or "pre-pubesc*" ) OR AB ( pediatric* or paediatric* or child* or toddler* or                                                                                                                                                                                                                                                                                                                        | Search modes - Boolean/Phrase                                                                          | Interface - EBSCOhost<br>Research Databases<br>Search Screen - Advanced<br>Search<br>Database - CINAHL Plus with<br>Full Text |

|    |                                                                                                                                                                                                                                                                                                                                                                                                                                                                                                                                                                                                                                                                                                |                               |                                                                                                                            |
|----|------------------------------------------------------------------------------------------------------------------------------------------------------------------------------------------------------------------------------------------------------------------------------------------------------------------------------------------------------------------------------------------------------------------------------------------------------------------------------------------------------------------------------------------------------------------------------------------------------------------------------------------------------------------------------------------------|-------------------------------|----------------------------------------------------------------------------------------------------------------------------|
|    | pubescen* or juvenile* or teen* or youth* or adolesc*or prepubesc* or "pre-pubesc*" ) OR SO ( child* or pediatric* or paediatric* or adolescent )                                                                                                                                                                                                                                                                                                                                                                                                                                                                                                                                              |                               |                                                                                                                            |
| S7 | (MH "Adolescence")                                                                                                                                                                                                                                                                                                                                                                                                                                                                                                                                                                                                                                                                             | Search modes - Boolean/Phrase | Interface - EBSCOhost<br>Research Databases<br>Search Screen - Advanced<br>Search<br>Database - CINAHL Plus with Full Text |
| S6 | (MH "Child, Preschool") OR (MH "Child")                                                                                                                                                                                                                                                                                                                                                                                                                                                                                                                                                                                                                                                        | Search modes - Boolean/Phrase | Interface - EBSCOhost<br>Research Databases<br>Search Screen - Advanced<br>Search<br>Database - CINAHL Plus with Full Text |
| S5 | S1 OR S2 OR S3 OR S4                                                                                                                                                                                                                                                                                                                                                                                                                                                                                                                                                                                                                                                                           | Search modes - Boolean/Phrase | Interface - EBSCOhost<br>Research Databases<br>Search Screen - Advanced<br>Search<br>Database - CINAHL Plus with Full Text |
| S4 | TI ( ("anxiety disorder#" or "anxiety neuroses" or "neurotic anxiety state#" or "generalized anxiety" or "generalised anxiety" or "panic disorder#" or "panic attack#" or "selective mutism*" or "social anxiety*" or "separation anxiety*" or neuroses or neurosis or "neurotic disorder#" or psychoneuroses or psychoneurosis or phobia# or phobic or claustrophobia# or claustrophobic) ) OR AB ( ("anxiety disorder#" or "anxiety neuroses" or "neurotic anxiety state#" or "generalized anxiety" or "generalised anxiety" or "panic disorder#" or "panic attack#" or "selective mutism*" or "social anxiety*" or "separation anxiety*" or neuroses or neurosis or "neurotic disorder#" or | Search modes - Boolean/Phrase | Interface - EBSCOhost<br>Research Databases<br>Search Screen - Advanced<br>Search<br>Database - CINAHL Plus with Full Text |

|    |                                                                                                                                                            |                               |                                                                                                                            |
|----|------------------------------------------------------------------------------------------------------------------------------------------------------------|-------------------------------|----------------------------------------------------------------------------------------------------------------------------|
|    | psychoneuroses or psychoneurosis or phobia# or phobic or claustrophobia# or claustrophobic )                                                               |                               |                                                                                                                            |
| S3 | (MH "Neurotic Disorders")                                                                                                                                  | Search modes - Boolean/Phrase | Interface - EBSCOhost<br>Research Databases<br>Search Screen - Advanced<br>Search<br>Database - CINAHL Plus with Full Text |
| S2 | (MH "Anxiety Disorders")<br>OR (MH "Generalized Anxiety Disorder") OR (MH "Panic Disorder") OR (MH "Phobic Disorders+") OR (MH "Social Anxiety Disorders") | Search modes - Boolean/Phrase | Interface - EBSCOhost<br>Research Databases<br>Search Screen - Advanced<br>Search<br>Database - CINAHL Plus with Full Text |
| S1 | (MH "Anxiety Disorders")                                                                                                                                   | Search modes - Boolean/Phrase | Interface - EBSCOhost<br>Research Databases<br>Search Screen - Advanced<br>Search<br>Database - CINAHL Plus with Full Text |
